# Supplementary material for: The Protective Effect of Auricularia cornea var. Li. Polysaccharide on Alcoholic Liver Disease and Its Effect on Intestinal Microbiota
Source: MDPI journal article supplement (doi:10.3390/molecules28248003), 2023-12-08
Supplement: s1 [file s1]

A

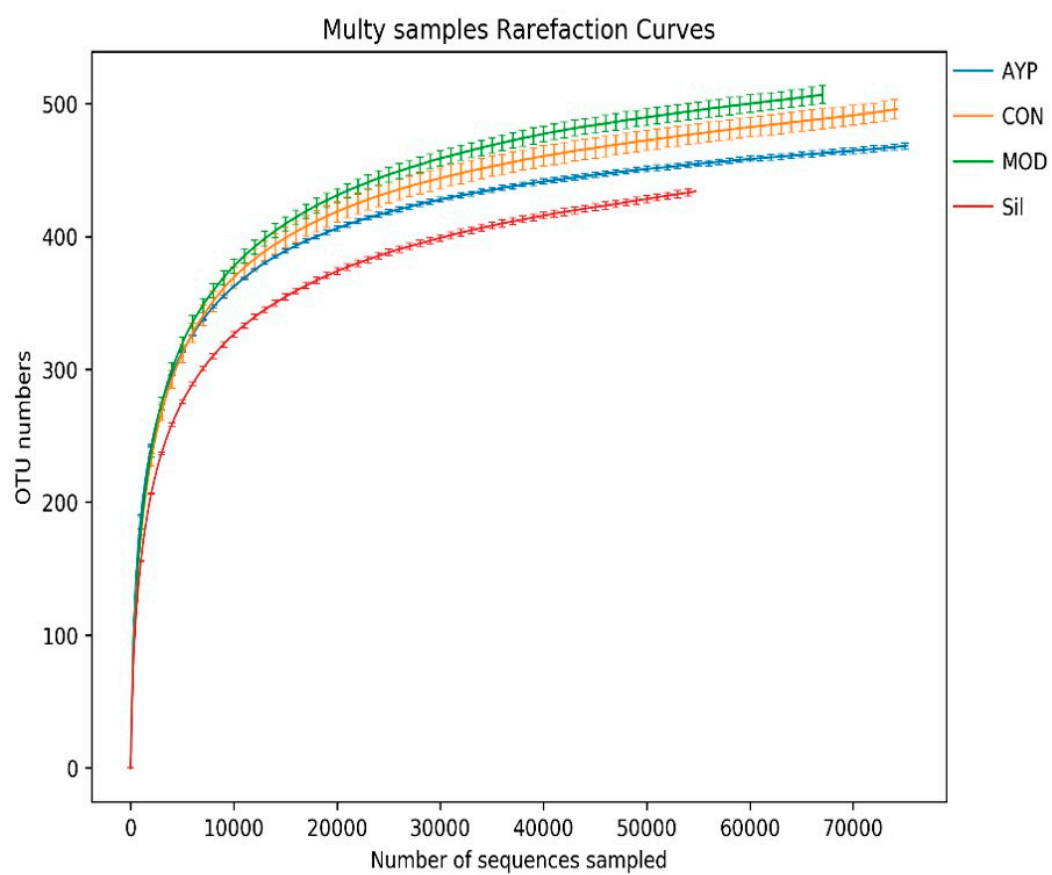

**B**

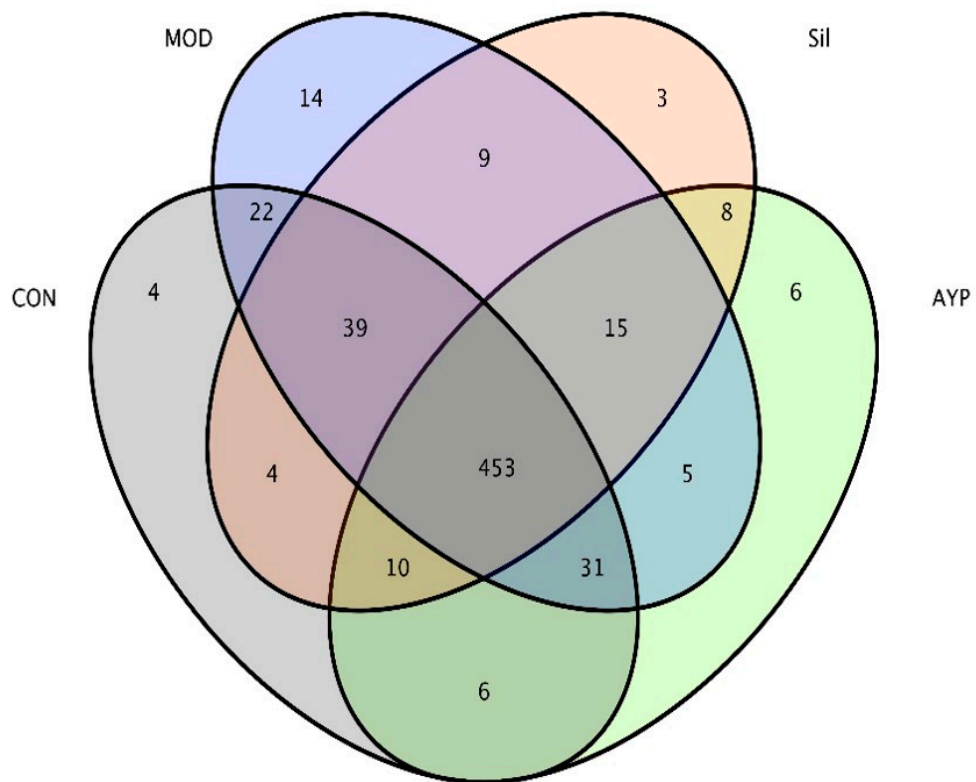

C

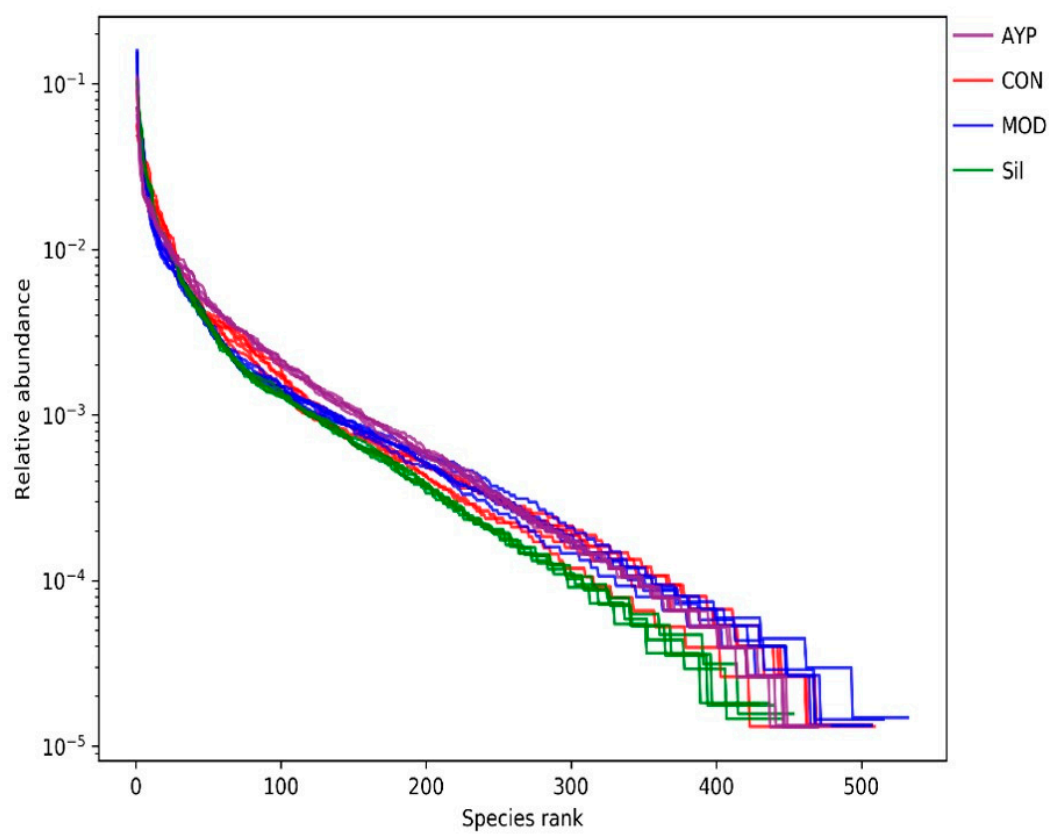

**D**

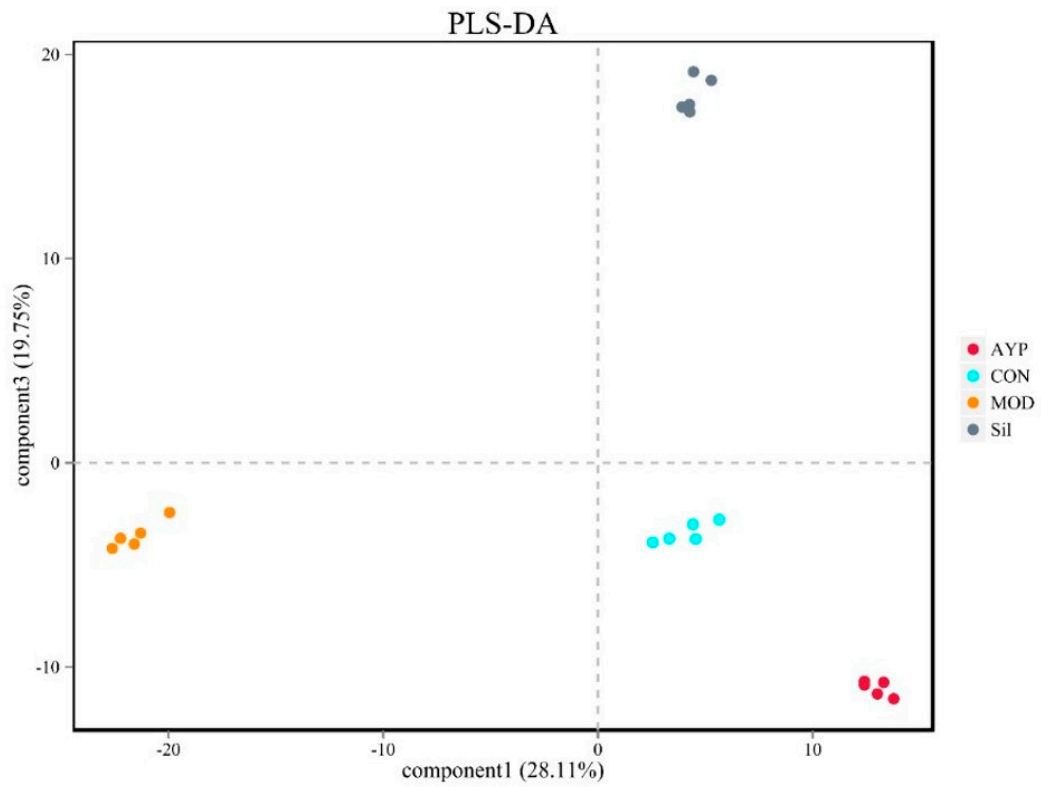

**E**

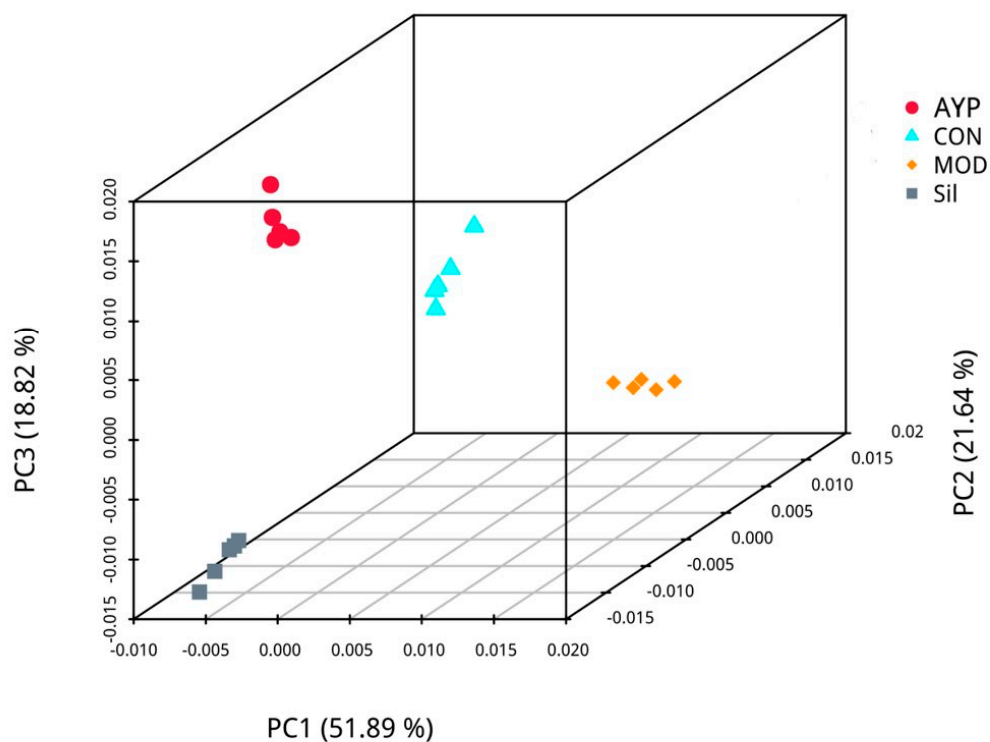

**Figure S1.**

Figure S1.  $\alpha$  diversity of intestinal bacteria. Rarefaction Curve(A), Shannon index curve(B), Rank abundance curve(C).  $\beta$  diversity analysis of intestinal bacteria. Partial Least Squares Discriminant Analysis(D), Principal Component Analysis(E).
